# Supplementary material for: High prevalence of hepatitis B infections in Burkina Faso (1996–2017): a systematic review with meta-analysis of epidemiological studies
Source: Springer Nature journal article supplement (doi:10.1186/s12889-018-5432-7), 2018-04-25
Supplement: MOESM1 [file 15719752]

## Appendix: Method of meta-analysis

Variance of the studies and their weights in fixed model are given as follow[Ref]:  $v_i = [p_i (1 - p_i)] / n_i$ , and  $w_i = 1 / v_i$ , where  $i$ ,  $n_i$  and  $p_i$  denote index, sample size and prevalence of the study respectively. Using average weight and its variance as follow,  $\bar{w} = \sum_i w_i / k$ , and  $s_w^2 = (\sum_i w_i^2 - k\bar{w}^2) / (k - 1)$ , we calculated statistic  $U$  and  $\hat{\tau}$  as  $U = (k - 1) \{ \bar{w} - s_w^2 / (k\bar{w}) \}$  and  $\hat{\tau} = \max\{0, (Q - (k - 1)) / U\}$ . Then, weight in random-effect model and pooled prevalence were obtained by  $w_i^* = 1 / (\hat{\tau}^2 + v_i)$ , and  $\hat{p} = \sum_i w_i^* p_i / \sum_i w_i^*$ .

To assess heterogeneity among study, we calculated the Index of inconsistency ( $I^2$ ) [24] as  $Q = \sum_i w_i (p_i - \hat{p})^2$  and  $I^2 = 100 * \{Q - (k - 1)\} / Q$ .

Ref. Tango T. Introduction to Meta-analysis (in Japanese), Tokyo:Asakura-shoten; 2016
